# Supplementary material for: Genome-wide functional screens enable the prediction of high activity CRISPR-Cas9 and -Cas12a guides in Yarrowia lipolytica
Source: PubMed Central journal article supplement (PMC8854577; doi:10.1038/s41467-022-28540-0), 2022-02-17
Supplement: 41467_2022_28540_MOESM4_ESM.pdf [file 41467_2022_28540_MOESM4_ESM.pdf]

**Title: Supplementary Data 1.**

**Description:** Cutting scores of all Cas9 sgRNAs (including nontargeting guides) at days 2, 4 and 6.

**Title: Supplementary Data 2.**

**Description:** Cutting scores of all Cas12a sgRNAs (including nontargeting guides) at days 2, 4 and 6.

**Title: Supplementary Data 3.**

**Description:** Normalized sgRNA abundance for both the control strain (not expressing Cas9) and treatment strain (expressing Cas9 and disrupted for KU70) at days 2, 4 and 6, when transformed with the Cas9 library.

**Title: Supplementary Data 4.**

**Description:** Normalized sgRNA abundance for both the control strain (not expressing Cas12a) and treatment strain (expressing Cas12a and disrupted for KU70) at days 2, 4 and 6, when transformed with the Cas12a library.

**Title: Supplementary Data 5.**

**Description:** Average normalized nucleosome occupancy score for every sgRNA in the Cas9 and Cas12a libraries for which MNase-Seq data was available.
